# Supplementary material
Source: PubMed Central journal article supplement (PMC3697537)
Supplement: JB.00147-13_zjb999092650so1.pdf [file JB.00147-13_zjb999092650so1.pdf]

**TABLE S1.** The primers used in this study

| Application purpose                                                                 | Primer name    | Oligonucleotide sequence (5'→3') | Reference  |
|-------------------------------------------------------------------------------------|----------------|----------------------------------|------------|
| PCR and sequence<br>for <i>rpoB</i> of <i>Streptomyces</i> spp.                     | Strp-rpoB890F  | CCCGAAGCGCTACGACCTCGC            | This study |
|                                                                                     | Strp-rpoB1440R | GAGGCGAGCGAGCCGATCAGAC           |            |
| PCR and sequence<br>for <i>rpoB</i> of <i>A. orientalis</i> and <i>S. erythraea</i> | Sp-rpob887F    | GGAGAAGCGCTACGACCTGGCC           | This study |
|                                                                                     | Sp-rpob1480R   | CGTCTCGATGAAGCCGAACGGGTTGAC      |            |
| Real-time PCR<br>for <i>hrdB</i> of <i>S. griseus</i>                               | SGR1701 hrdB F | GAAGGTCATCGAGGTCCAGAAG           | 1          |
|                                                                                     | SGR1701 hrdB R | GTGGCGGAGCTTCGACATC              |            |
| Real-time PCR<br>for <i>adpA</i> of <i>S. griseus</i>                               | adpA-77F       | TTGCCGTGCTGCTGTTCA               | 2          |
|                                                                                     | adpA-130R      | AAACGGAGAGCGGGATGGA              |            |
| Real-time PCR<br>for <i>metK</i> of <i>S. griseus</i>                               | metK-F2        | CAACCTCGTGCGCAACAA               | 2          |
|                                                                                     | metK-R2        | CACAGGAAGCACCGTCGAA              |            |
| Real-time PCR<br>for <i>strR</i> of <i>S. griseus</i>                               | SGR5931 strR F | AATTATCCGCCGTGACAATGG            | 1          |
|                                                                                     | SGR5931 strR R | GGATGGGTCTCCAGGACAC              |            |
| Real-time PCR<br>for <i>strB1</i> of <i>S. griseus</i>                              | strB1-F2       | ACTACGAGAGCCAGGAGCAGAT           | 2          |
|                                                                                     | strB1-R2       | TGACTCCGAGCTTGGTCAACT            |            |
| Real-time PCR<br>for <i>strD</i> of <i>S. griseus</i>                               | strD-F2        | ACCCACACGTCTGCGAAAC              | 2          |
|                                                                                     | strD-R2        | TGGCCTCCAGCCCATAGA               |            |
| Real-time PCR<br>for <i>strF</i> of <i>S. griseus</i>                               | StrF-F2        | GACTACGACAAGGTGCACGACTA          | 2          |
|                                                                                     | StrF-R2        | AAGCGGATGTTCTCGATGGT             |            |
| Real-time PCR<br>for SGR 281 of <i>S. griseus</i>                                   | 281-802F       | CGCACGATCTGGAAGAACCT             | 2          |
|                                                                                     | 281-874R       | GGTAGTAGAGGCGATCGACGTAGA         |            |
| Real-time PCR<br>for SGR 443 of <i>S. griseus</i>                                   | 443-643F       | GTGCAGTCCCGCGAGATG               | 2          |
|                                                                                     | 443-727R       | GGTAGCGCCGTTTCGTTGTC             |            |
| Real-time PCR<br>for SGR 593 of <i>S. griseus</i>                                   | 593-44F        | GTTCTTGCCTGACCTGAATG             | 2          |
|                                                                                     | 593-101R       | CGCGAGAGAAGCGGATCA               |            |
| Real-time PCR<br>for SGR 604 of <i>S. griseus</i>                                   | 604-15F        | GCCCTACTACGAACTGCGTCAT           | 2          |
|                                                                                     | 604-78R        | GTAGACGTTGCCGACCAGGTT            |            |

|                                                    |                         |                                                  |   |
|----------------------------------------------------|-------------------------|--------------------------------------------------|---|
| Real-time PCR<br>for SGR 811 of <i>S. griseus</i>  | 811-F825<br>811-R899    | CCTGCCCTACCTGATGTTTCC<br>CAGTTCTGTTCGGTGAACCATTC | 2 |
| Real-time PCR<br>for SGR 896 of <i>S. griseus</i>  | 896-F702<br>896-R770    | GGAGTGCCGCGAGATCTTC<br>TCGAGGACGGCGATGCTT        | 2 |
| Real-time PCR<br>for SGR 962 of <i>S. griseus</i>  | 962-551F<br>962-627R    | TCCCCCTCAACATCTACGACTT<br>GCGTTTCGCGGAGACGAT     | 2 |
| Real-time PCR<br>for SGR 2079 of <i>S. griseus</i> | 2079-190F<br>2079-245R  | GCCACACAGGCCCATCTC<br>ACCAGGAAGGCCAGAAAA         | 2 |
| Real-time PCR<br>for SGR 2488 of <i>S. griseus</i> | 2488-501F<br>2488-582R  | GTCCGGCTCGATCGTCAAC<br>GTGCTTGGCCGCGACGTA        | 2 |
| Real-time PCR<br>for SGR 2594 of <i>S. griseus</i> | 2594-825F<br>2594-889R  | CGTCTTCGGCATGGTCATG<br>ATCTGCTCGACGGGTTC         | 2 |
| Real-time PCR<br>for SGR 3267 of <i>S. griseus</i> | 3267-F945<br>3267-R1007 | CGTCGTCACGCTCTGGAA<br>TCCTCAGGACGGTCGAACAC       | 2 |
| Real-time PCR<br>for SGR 4413 of <i>S. griseus</i> | 4413-140F<br>4413-199R  | TCGCCGGGTACTTCTTCATC<br>TGAGGCGCAGCCGTACGT       | 2 |
| Real-time PCR<br>for SGR 5295 of <i>S. griseus</i> | 5295-F189<br>5295-R253  | CAACGACTACCTGGGCATGA<br>GCAGGGTGGAGGCGATCT       | 2 |
| Real-time PCR<br>for SGR 6072 of <i>S. griseus</i> | 6072-F27<br>6072-R99    | CACCGTCCTGGAGTACTTCGA<br>GTCGGTGGCGAACAGCTT      | 2 |
| Real-time PCR<br>for SGR 6178 of <i>S. griseus</i> | 6178-F372<br>6178-R424  | CCGGGCTCCGGTGATC<br>CGTCATCGCCCCTCAGATG          | 2 |
| Real-time PCR<br>for SGR 6367 of <i>S. griseus</i> | 6367-F142<br>6367-R198  | GCGTTCACGTCCGTTTCC<br>GCTGCGGGCGACACA            | 2 |
| Real-time PCR<br>for SGR 6717 of <i>S. griseus</i> | 6717-864F<br>6717-922R  | CGCGCAGTTCATCATGGAA<br>TCATCACGTA CTGGGCATCTC    | 2 |
| Real-time PCR<br>for SGR 6780 of <i>S. griseus</i> | 6780-F381<br>6780-R457  | CGGCGTCTCCGAGCAGAT<br>CGTTGTGGTTGGCGATGAC        | 2 |

|                                                                            |                                  |                                                  |   |
|----------------------------------------------------------------------------|----------------------------------|--------------------------------------------------|---|
| Real-time PCR<br>for <i>hrdB</i> of <i>S. coelicolor</i>                   | hrdB-F918<br>hrdB-R980           | GGGCAACCTCGGTCTGATC<br>GAGAACTTGTAGCCCTTGGTGTAGT | 3 |
| Real-time PCR<br>for SCO0124 of <i>S. coelicolor</i>                       | SCO0124-F1132<br>SCO0124-R1195   | GAGGACCCGTCGGCATTG<br>GGGTGAGGTAGGCCGTGAT        | 3 |
| Real-time PCR<br>for SCO0381 of <i>S. coelicolor</i>                       | SCO0381-F1280<br>SCO0381-R1351   | GCCCGGACATCCGAAGAC<br>CGCTGCGTCCGCTGATCT         | 3 |
| Real-time PCR<br>for SCO0489 of <i>S. coelicolor</i>                       | SCO0489-F3<br>SCO0489-R66        | GAGACCAACCCCTTCGA<br>CTGGCCCTCGTCGTTAC           | 3 |
| Real-time PCR<br>for SCO1207 of <i>S. coelicolor</i>                       | SCO1207-F495<br>SCO1207-R601     | CACCGACCGGCACTCCAT<br>CCGAGAAGTAGGCGTTCATCTC     | 3 |
| Real-time PCR<br>for SCO1268 of <i>S. coelicolor</i>                       | SCO1268-F544<br>SCO1268-R609     | GTCGGACAGGCGGAGGAA<br>GGGCAGGGAGACGAAACTG        | 3 |
| Real-time PCR<br>for SCO2785 of <i>S. coelicolor</i>                       | SCO2785-F819<br>SCO2785-R889     | CCTGGCCCAGCAGTCCAT<br>GGGCAGTCTTACGTAGTGCTT      | 3 |
| Real-time PCR<br>for SCO3215 of <i>S. coelicolor</i>                       | SCO3215-F303<br>SCO3215-R364     | CGGACTGGTGC GCAAGGT<br>CGCAGGTGAGGATGTTGAAGT     | 3 |
| Real-time PCR<br>for SCO5085 ( <i>actII-ORF4</i> ) of <i>S. coelicolor</i> | actII-ORF4-F17<br>actII-ORF4-R76 | TGGGACGTGTCCATGTAATCA<br>CCTTCGAGGATTTAAGCGGAAT  | 3 |
| Real-time PCR<br>for SCO5223 of <i>S. coelicolor</i>                       | SCO5223-F814<br>SCO5223-R866     | CTCACCCCGGGCAGTGAA<br>GCCTGGAGCAACCACATGA        | 3 |
| Real-time PCR<br>for SCO5800 of <i>S. coelicolor</i>                       | SCO5800-F1651<br>SCO5800-R1705   | GACGAGCGCTTCGCCTACTA<br>TGCCGATGAGACCGAACA       | 3 |
| Real-time PCR<br>for SCO5877 ( <i>redD</i> ) of <i>S. coelicolor</i>       | redD-F201<br>redD-R265           | CGGACCCAGCCTGTACAAC T<br>CGATCGATACGGGTCCCAAT    | 3 |
| Real-time PCR<br>for SCO6283 of <i>S. coelicolor</i>                       | SCO6283-F312<br>SCO6283-R406     | CACGAGCGAGGCCTTCCT<br>CGAAGTTCTGCGGAACCA         | 3 |

|                                                         |                                          |                                                  |            |
|---------------------------------------------------------|------------------------------------------|--------------------------------------------------|------------|
| Real-time PCR<br>for SCO6430 of <i>S. coelicolor</i>    | SCO6430-F458<br>SCO6430-R579             | TGCAGTCCACCCAGATGTTT<br>CCAGACGGTGACCACGTACA     | 3          |
| Real-time PCR<br>for SCO6766 of <i>S. coelicolor</i>    | SCO6766-F35<br>SCO6766-R91               | CTACATACCTGGCCGAACAGAAG<br>CCACGATGAGCGGGAAC     | 3          |
| Real-time PCR<br>for SCO6826 of <i>S. coelicolor</i>    | SCO6826-F772<br>SCO6826-R827             | AGGGTCTGCCACGTGTTCA<br>GGGTCGAGGATGACCTTCAG      | 3          |
| Real-time PCR<br>for SCO7670 of <i>S. coelicolor</i>    | SCO7670-F278<br>SCO7670-R382             | TCGGGCCCTACTGGAACAC<br>CCACGACCGCGAGGTAGTT       | 3          |
| Real-time PCR<br>for SCO7684 of <i>S. coelicolor</i>    | SCO7684-F629<br>SCO7684-R748             | ACACCGAACACCGGTCCTT<br>CGGGATGGACGTTGTACCA       | 3          |
| Real-time PCR<br>for <i>sigA</i> of <i>S. erythraea</i> | RT- <i>sigA</i> -F<br>RT- <i>sigA</i> -R | CTACCTCAAGCAGATCGGCAAG<br>GATCAGGTCCAGGAACGCCATG | 4          |
| Real-time PCR<br>for <i>bldD</i> of <i>S. erythraea</i> | RT- <i>bldD</i> -F<br>RT- <i>bldD</i> -R | GGCGTCGAGCAGAAGTCAGGCG<br>CTCCAGGTTGATCACGACTTTG | 4          |
| Real-time PCR<br>for SACE_0020 of <i>S. erythraea</i>   | 0020-F605<br>0020-R705                   | GCGTCTACCGCGCTACT<br>GGGACGCACCAGCGTGAT          | This study |
| Real-time PCR<br>for SACE_1307 of <i>S. erythraea</i>   | 1307-F112<br>1307-R171                   | GAGGAGCTCACCGGTTTCC<br>GGGCACGAACACCTTGATGT      | This study |
| Real-time PCR<br>for SACE_2345 of <i>S. erythraea</i>   | 2345-F426<br>2345-R479                   | CGGCACGGTGGAGTTCCT<br>TTGGCCTCGATCCACTCGTA       | This study |
| Real-time PCR<br>for SACE_2622 of <i>S. erythraea</i>   | 2622-F336<br>2622-R391                   | GCTCGAACCCACCATTTCG<br>GATGCAGGATGCGATCGAT       | This study |
| Real-time PCR<br>for SACE_2631 of <i>S. erythraea</i>   | 2631-F181<br>2631-R239                   | GATGCTCCGCGCTTCAAC<br>CCGTCCATGCTCATCATCGA       | This study |
| Real-time PCR<br>for SACE_2703 of <i>S. erythraea</i>   | 2703-F166<br>2703-R225                   | GCGTTCGCCTGCTCTGAT<br>GGGAACGCGCTGGAAGTACA       | This study |
| Real-time PCR<br>for SACE_2874 of <i>S. erythraea</i>   | 2874-F979<br>2874-R1057                  | CCGCTGCTCGTGGAGAAG<br>GGAACGTGTTGCCGTGCAT        | This study |

|                                                       |                          |                                                  |            |
|-------------------------------------------------------|--------------------------|--------------------------------------------------|------------|
| Real-time PCR<br>for SACE_3226 of <i>S. erythraea</i> | 3226-F234<br>3226-R294   | GGTGATCCCGAGTTCGT<br>GTAGCCCCCAGGCAGAA           | This study |
| Real-time PCR<br>for SACE_3721 of <i>S. erythraea</i> | 3721-F50<br>3721-R106    | GCAGCATCGCCGAGTACTG<br>CGCCGAGCTCCAGTTGA         | This study |
| Real-time PCR<br>for SACE_4130 of <i>S. erythraea</i> | 4130-F1077<br>4130-R1197 | GTTTCGCGACCAAGGAAGTTC<br>TTCGAGTAGCCGCAGCAGTT    | This study |
| Real-time PCR<br>for SACE_4302 of <i>S. erythraea</i> | 4302-F363<br>4302-R414   | CGCGCTGGACATGTTTCATC<br>CTTCGGCTTGCCGTATGG       | This study |
| Real-time PCR<br>for SACE_4471 of <i>S. erythraea</i> | 4471-F382<br>4471-R463   | CTGCTGCTGGACCAGATCCT<br>GGTACCGCACGGACAACGT      | This study |
| Real-time PCR<br>for SACE_4577 of <i>S. erythraea</i> | 4577-F40<br>4577-R161    | GGCTACTGGGAAGAGGTCATCCT<br>CCGACGTTTCATCTCGACGAT | This study |
| Real-time PCR<br>for SACE_4647 of <i>S. erythraea</i> | 4647-F334<br>4647-R427   | GGCTACAGCAAGGTTTTCAAGAG<br>CCACCATCGCACCGATCA    | This study |
| Real-time PCR<br>for SACE_5309 of <i>S. erythraea</i> | 5309-F424<br>5309-R482   | GACGTACTCGCGGACTTTCATC<br>CCCAACATGTCCACGATCGT   | This study |

## REFERENCES

1. **Ohnishi Y, Ishikawa J, Hara H, Suzuki H, Ikenoya M, Ikeda H, Yamashita A, Hattori M, Horinouchi S.** 2008. Genome sequence of the streptomycin-producing microorganism *Streptomyces griseus* IFO13350. *J. Bacteriol.* **190**:4050-4060.
2. **Tanaka Y, Tokuyama S, Ochi K.** 2009. Activation of secondary metabolite-biosynthetic gene clusters by generating *rsmG* mutations in *Streptomyces griseus*. *J. Antibiot. (Tokyo)* **62**:669-673.
3. **Tanaka Y, Hosaka T, Ochi K.** 2010. Rare earth elements activate the secondary metabolite-biosynthetic gene clusters in *Streptomyces coelicolor* A3(2). *J. Antibiot. (Tokyo)* **63**:477-481.
4. **Tanaka Y, Komatsu M, Okamoto S, Tokuyama S, Kaji A, Ikeda H, Ochi K.** 2009. Antibiotic overproduction by *rpsL* and *rsmG* mutants of various actinomycetes. *Appl. Environ. Microbiol.* **75**:4919-4922.

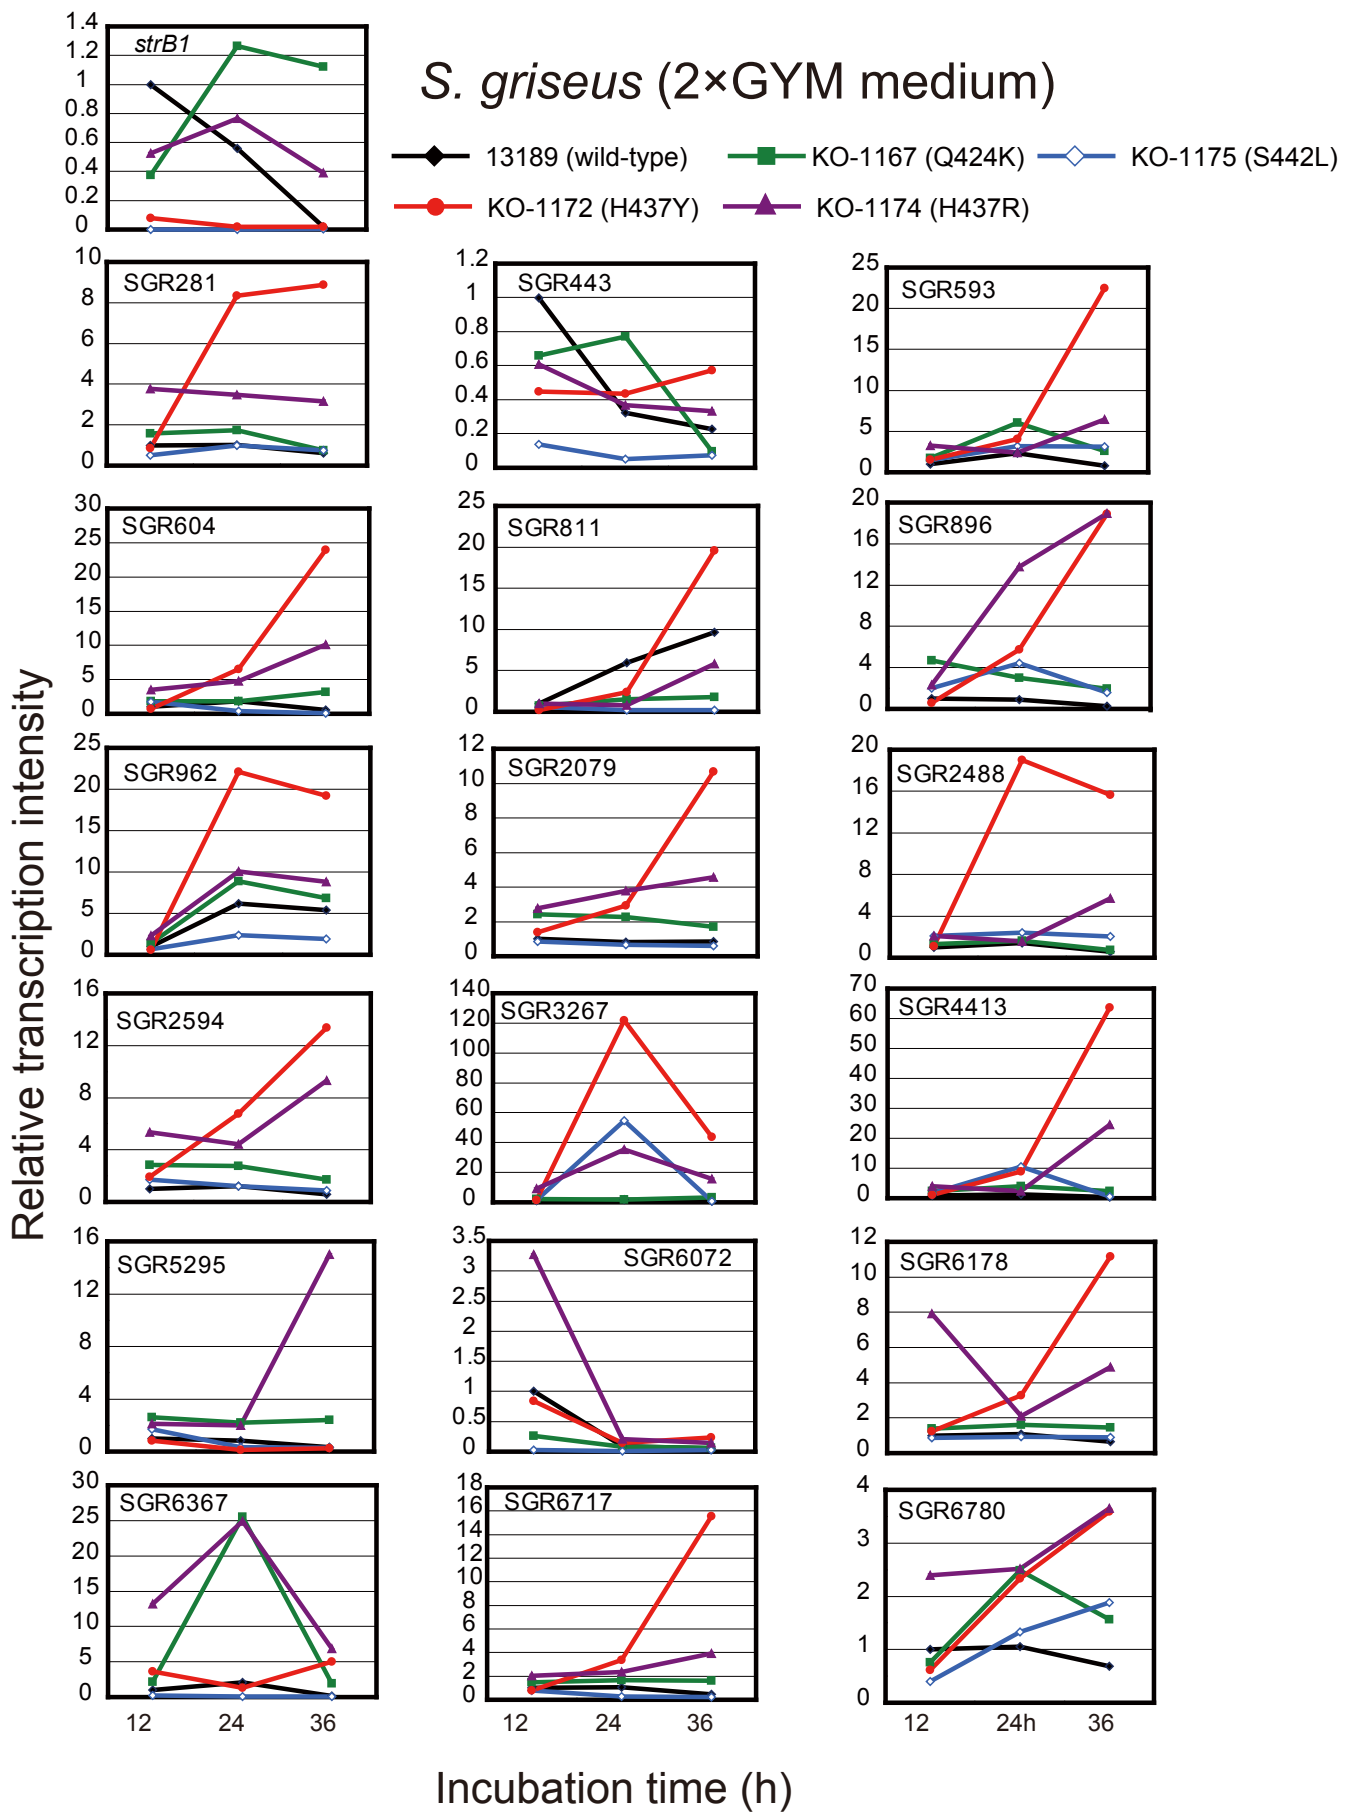

**Fig. S1. Profile of changes in expression of secondary metabolite-biosynthetic genes of the *S. griseus* *rpoB* mutants grown in 2×GYM medium**

The expression level detected in the wild-type strain IFO13189 at 12 h was taken as unity (= 1). See legend to Fig. 2 for details.

## *S. griseus* (R4 medium)

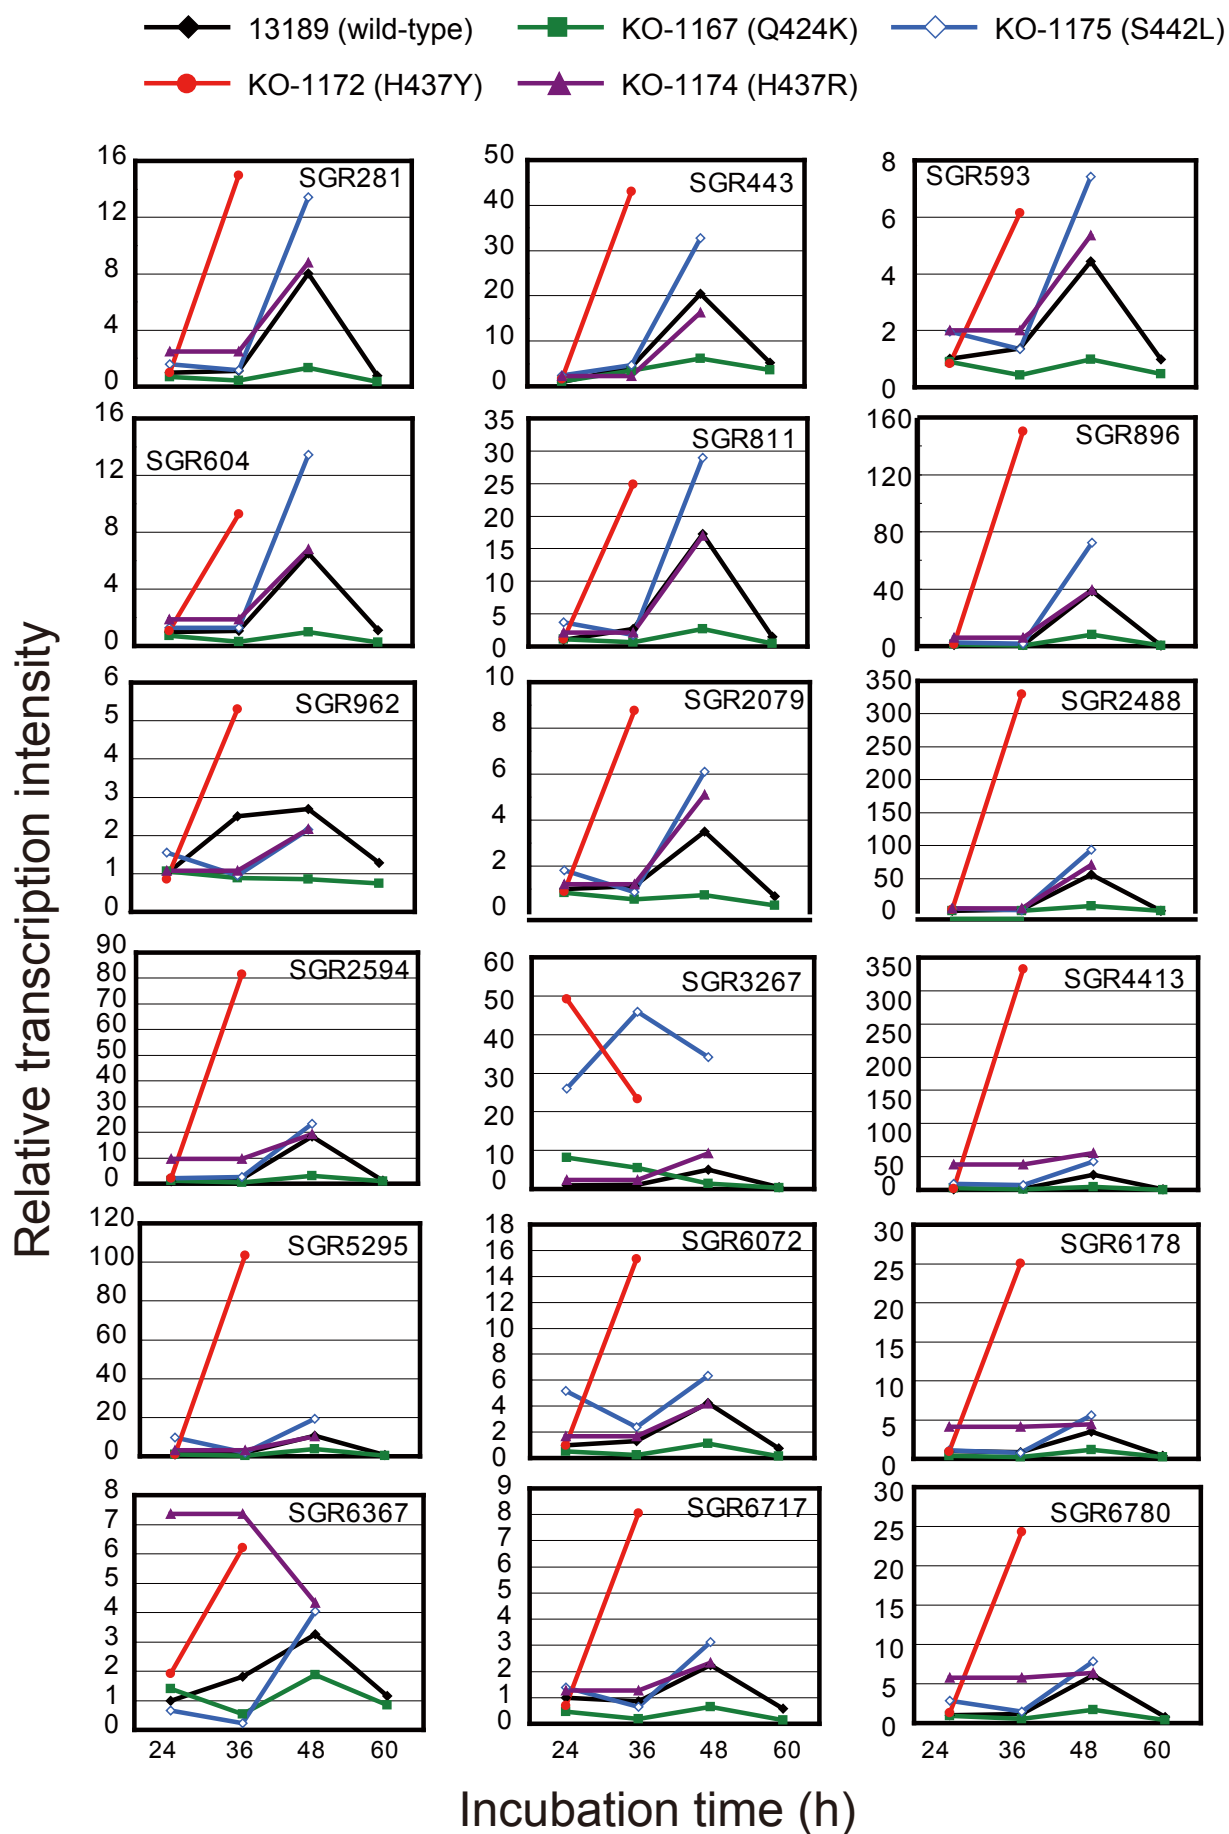

**Fig. S2. Profile of changes in expression of secondary metabolite-biosynthetic genes of the *S. griseus* *rpoB* mutants grown in R4 medium**

The expression level detected in the wild-type strain IFO13189 at 24 h was taken as unity (= 1). The data for the strain KO-1172 (H437Y) grown in R4 medium for 48 and 60 h are absent because this strain caused extensive autolysis at the late growth phase in R4 medium. See legend to Fig. 2 for details.

*S. coelicolor* A3(2) (GYM medium)

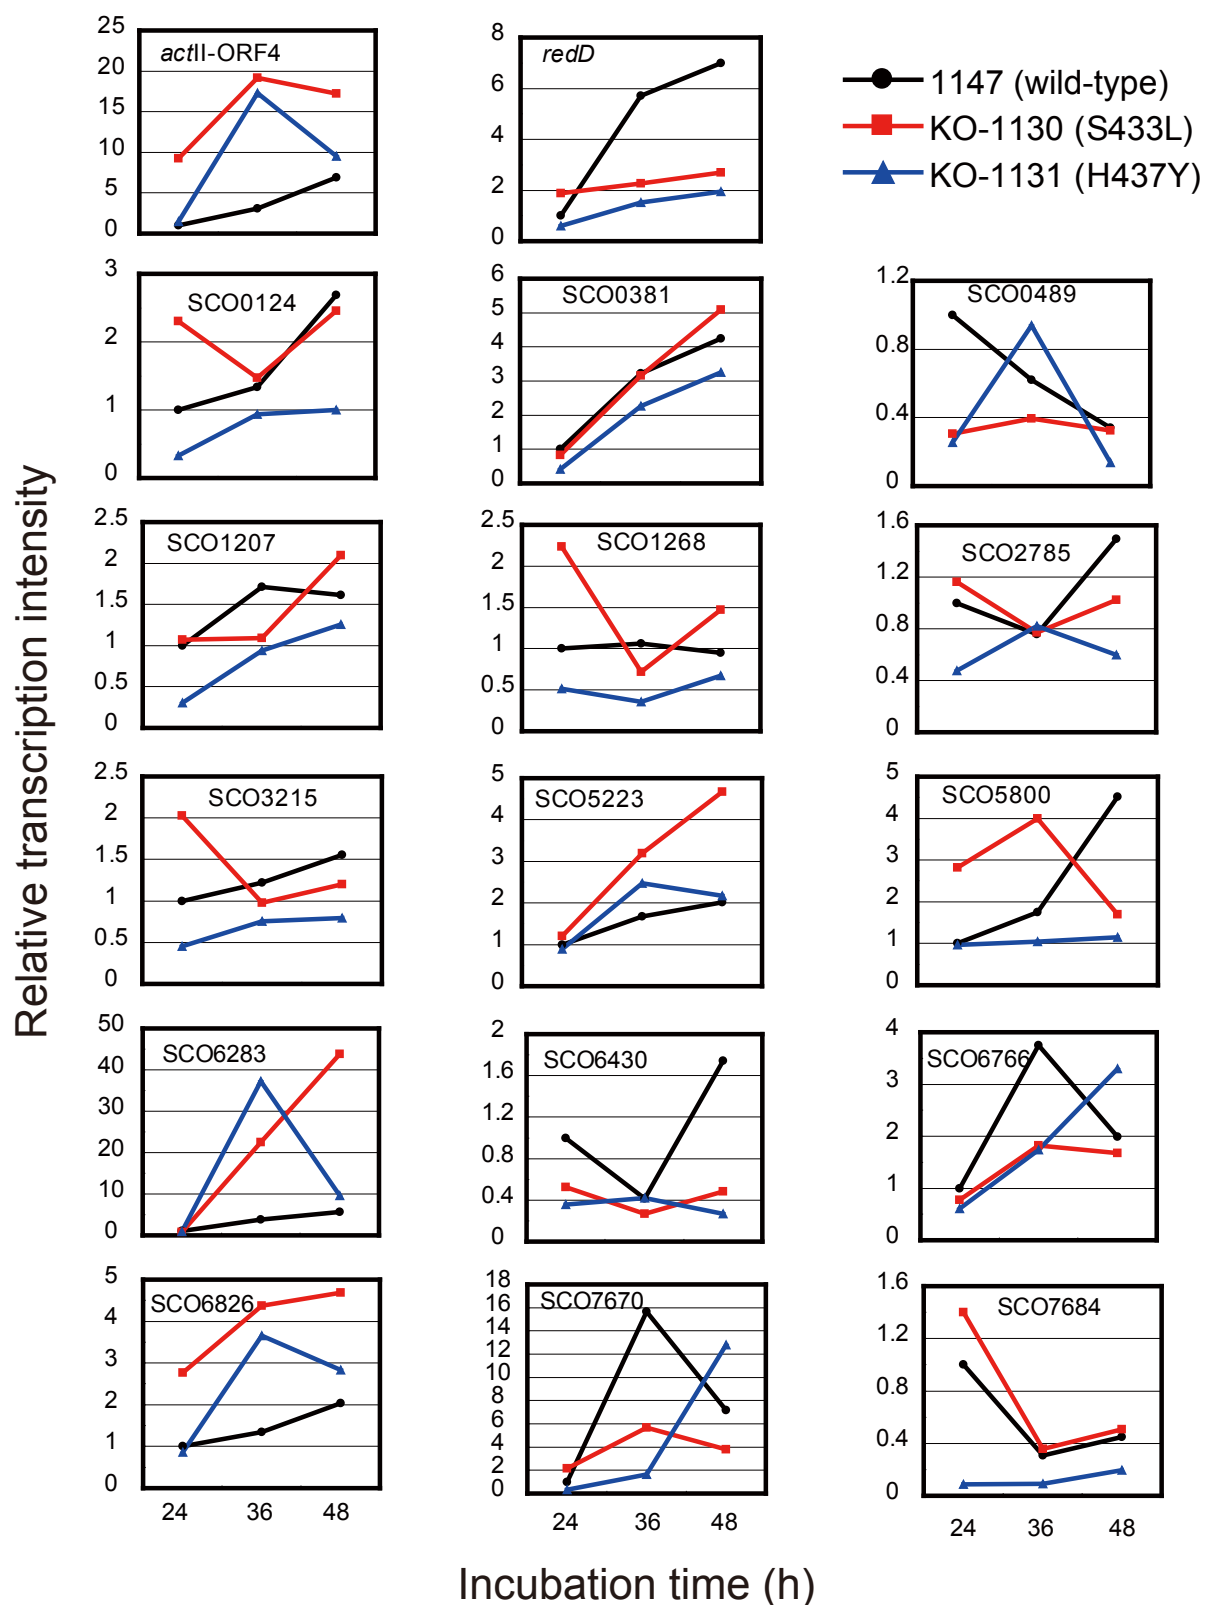

**Fig. S3. Profile of changes in expression of secondary metabolite-biosynthetic genes of the *S. coelicolor rpoB* mutants grown in GYM medium**

The expression level detected in the wild-type strain 1147 at 24 h was taken as unity (= 1). See legend to Fig. 2 for details.



*S. erythraea* (2×GYM medium)

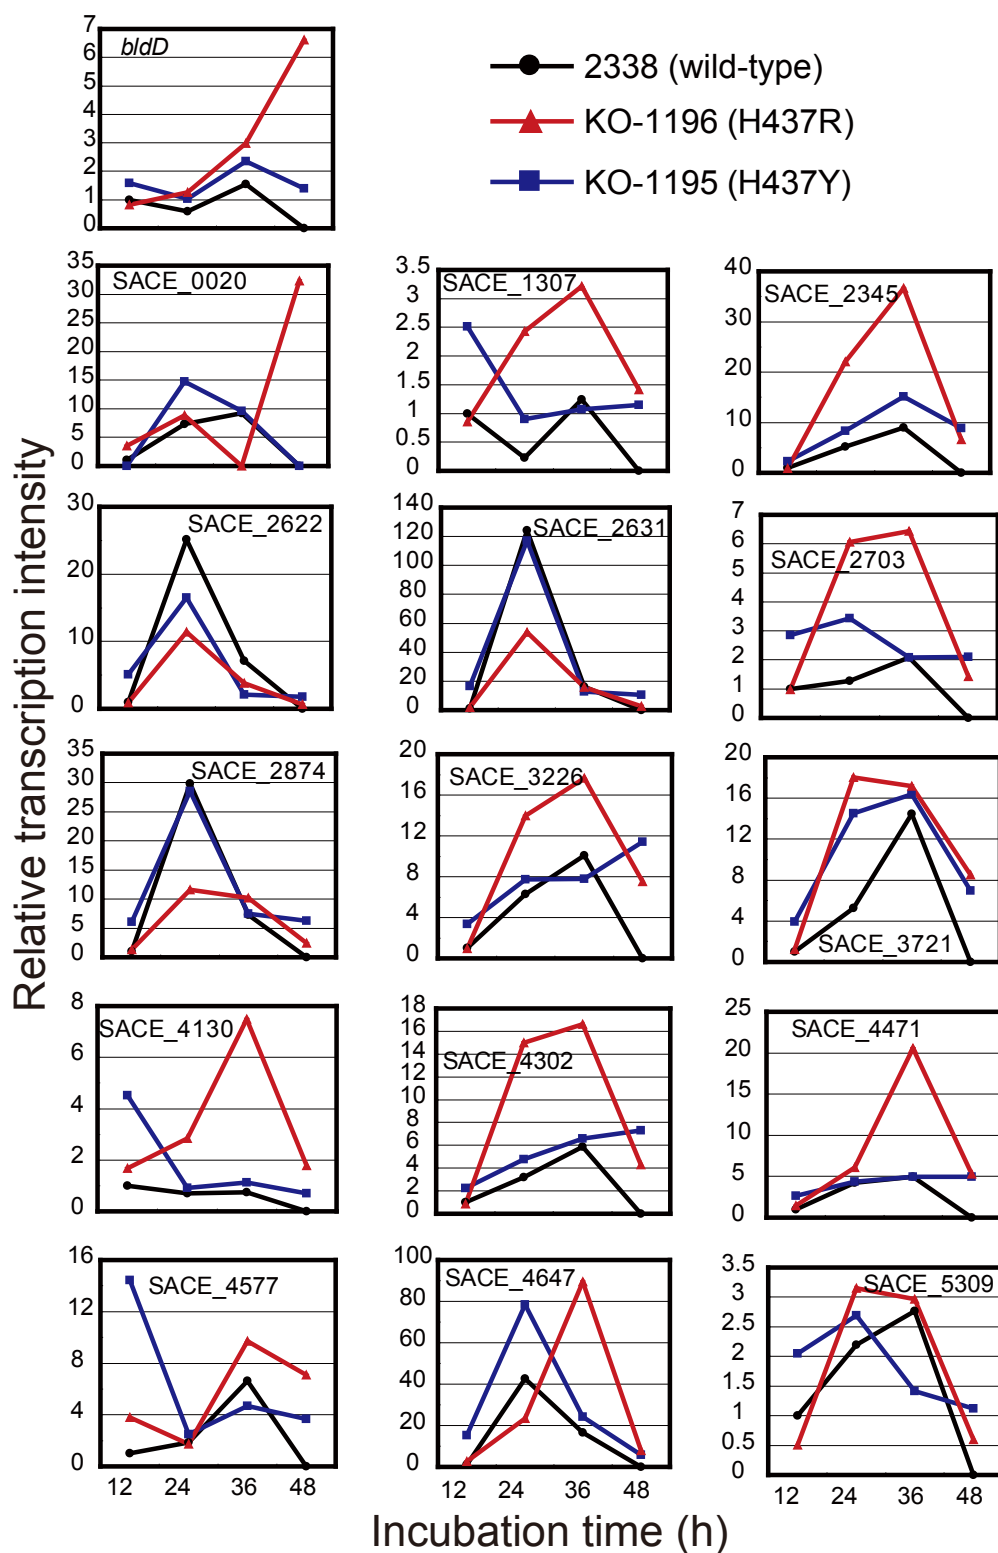

**Fig. S4. Profile of changes in expression of secondary metabolite-biosynthetic genes of *S. erythraea* *rpoB* mutants grown in 2×GYM medium**

The expression level detected in the wild-type strain NRRL2338 at 12 h was taken as unity (= 1). See legend to Fig. 2 for details.

A

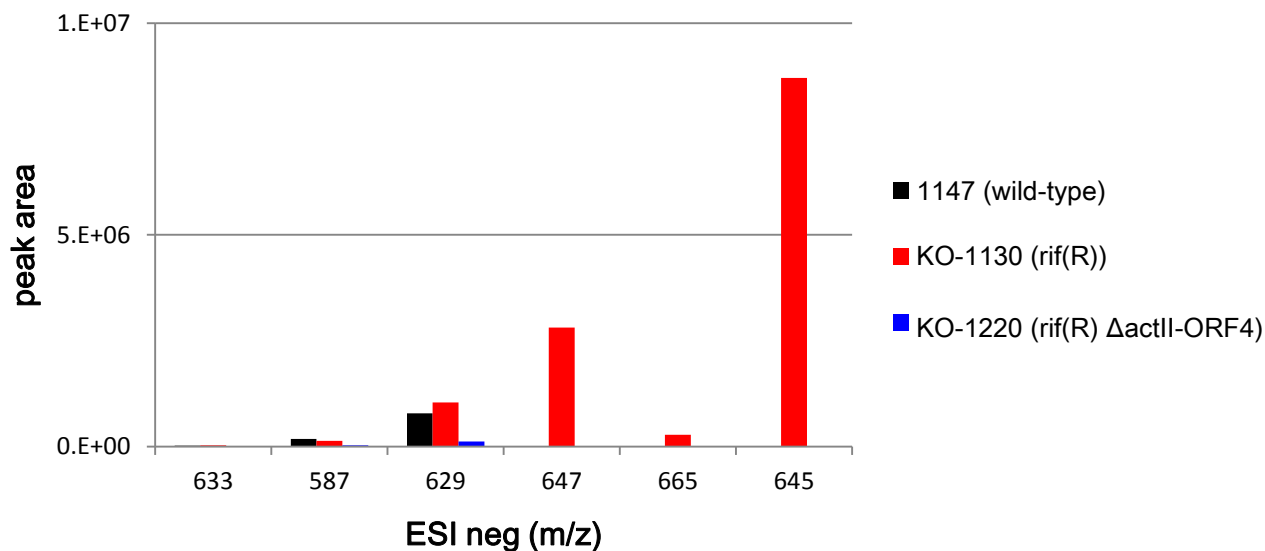

B

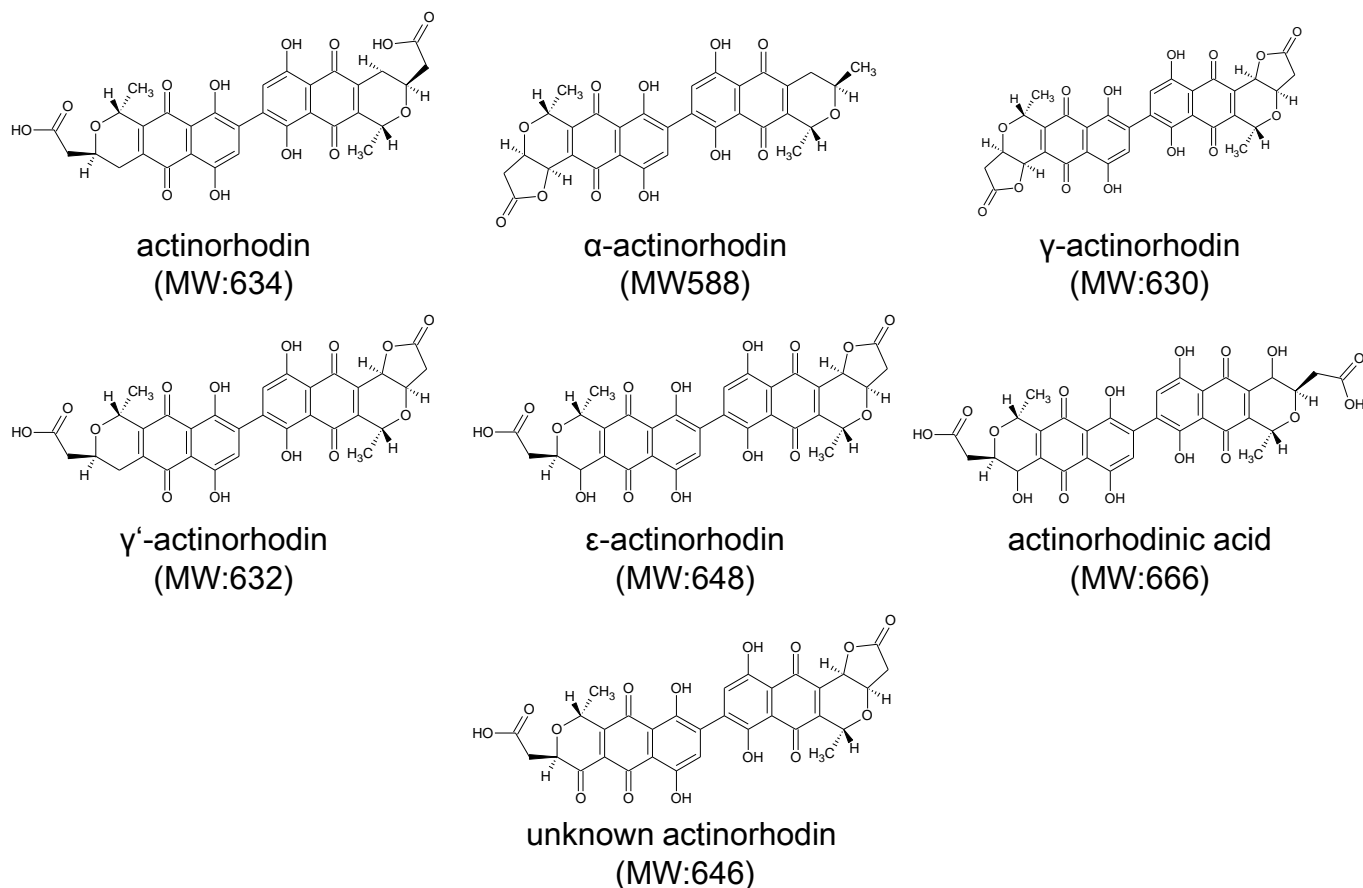

**Fig. S5. Actinorhodin-related metabolites produced by the *S. coelicolor* *rpoB* mutant KO-1130 and effects of introducing the  $\Delta$ actII-ORF4 mutation**

(A) UPLC/MS analysis of metabolites produced by *rpoB* mutants. The wild-type strain 1147 and *rpoB* mutant strains KO-1130 (rif(R)) and KO-1220 (rif(R)  $\Delta$ actII-ORF4) were grown for 4 days as described in the legend to Fig. 3. A double volume of acetonitrile was added to the culture broth and mixed well. The mixture was then centrifuged at  $15000 \times g$  for 1 min, and the supernatant was analyzed directly by UPLC/MS.

The analytical conditions were as follows: device, Waters ACQUITY UPLC H-Class; column, Waters ACQUITY UPLC BEH C18, (2.1 × 150 mm); column temperature, 40° C; gradient elution, solvent A (0.1% HCOOH in acetonitrile), solvent B (0.1% HCOOH in deionized water); gradient profile: 0 – 10 min, 10% – 95% A, 90% – 5% B; 10 – 13 min, 95% A, 5% B; 13 – 14 min, 95% – 10% A, 5% – 90% B; flow rate, 0.2 mL/min; detection, m/z 587, 629, 633, 645, 647, 665 using a Waters SQ detector mass spectrometer; ionization mode, ESI negative, capillary voltage, 3.0 kV; source temperature, 120° C; desolvation temperature, 350° C; desolvation gas flow, 600 L/h; cone gas flow, 50 L/h; cone voltage; 60 V.

(B) Chemical structures of actinorhodin and related compounds. The metabolites with m/z of 633, 587, 629, 647, and 665 in (A) were assigned as actinorhodin,  $\alpha$ -actinorhodin,  $\gamma$ -actinorhodin,  $\varepsilon$ -actinorhodin, and actinorhodinic acid, respectively. The possible structure of the metabolite with m/z of 645 is shown as unknown actinorhodin.
